# Supplementary material for: Climate windows of opportunity for plant expansion during the Phanerozoic
Source: Springer Nature journal article supplement (doi:10.1038/s41467-022-32077-7), 2022-08-04
Supplement: 41467_2022_32077_MOESM1_ESM.pdf [file 41467_2022_32077_MOESM1_ESM.pdf]

## Supplementary Information

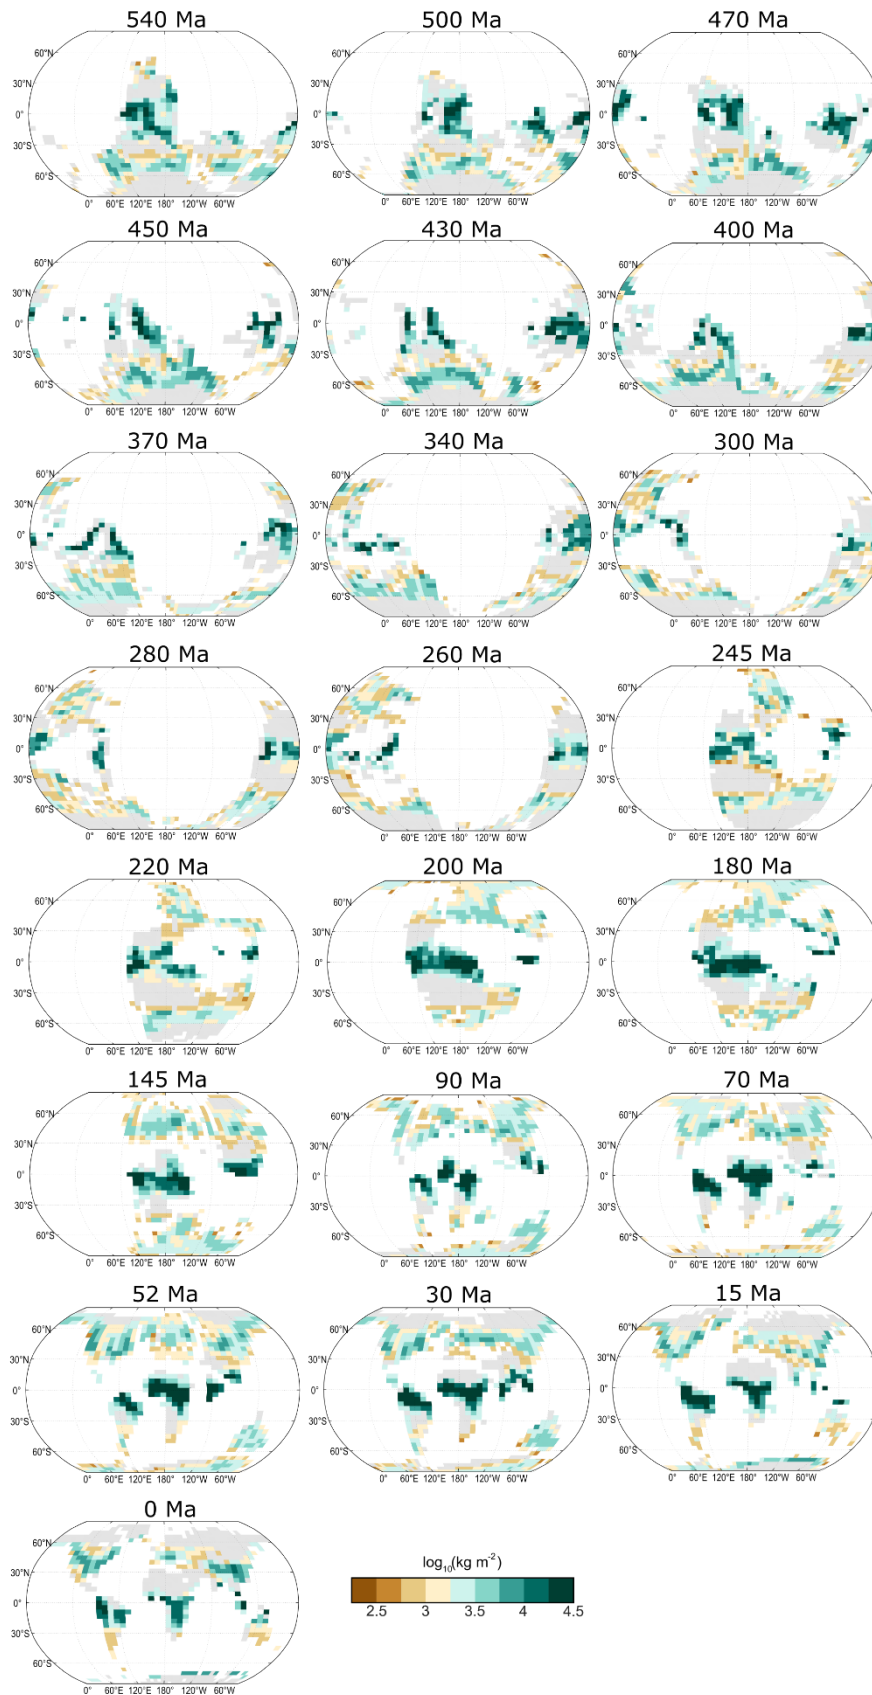

**Figure S1. Potential biomass maps throughout the Phanerozoic.** Maps showing terrestrial land (shaded grey) and potential biomass between 540-0 Ma (million years ago). The breakup of Pangea occurs between 200-180 Ma.

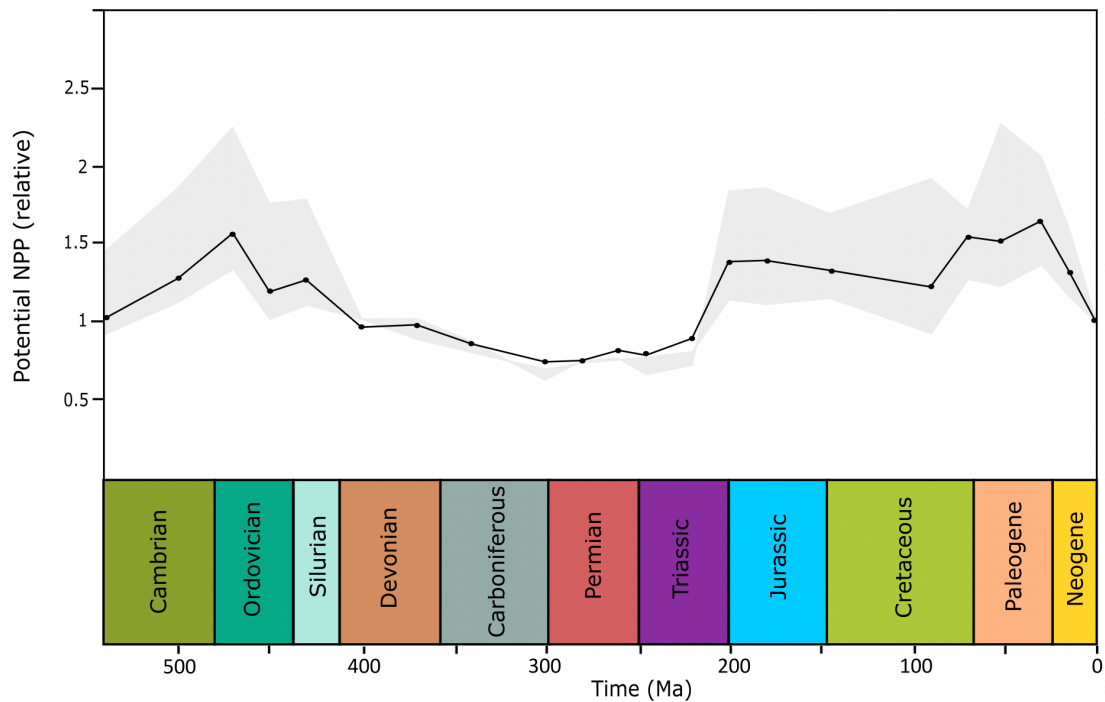

**Figure S2. Potential NPP over the Phanerozoic.** Relative to present day potential NPP. The pattern of NPP overtime matches that of biomass overtime due to the simplistic relationship between the two; a large portion of NPP is converted into biomass. Grey shaded area represents the min/max NPP obtained with the min/max CO<sub>2</sub> level used at each timepoint. Ma: million years ago.

# Runoff vs. biomass

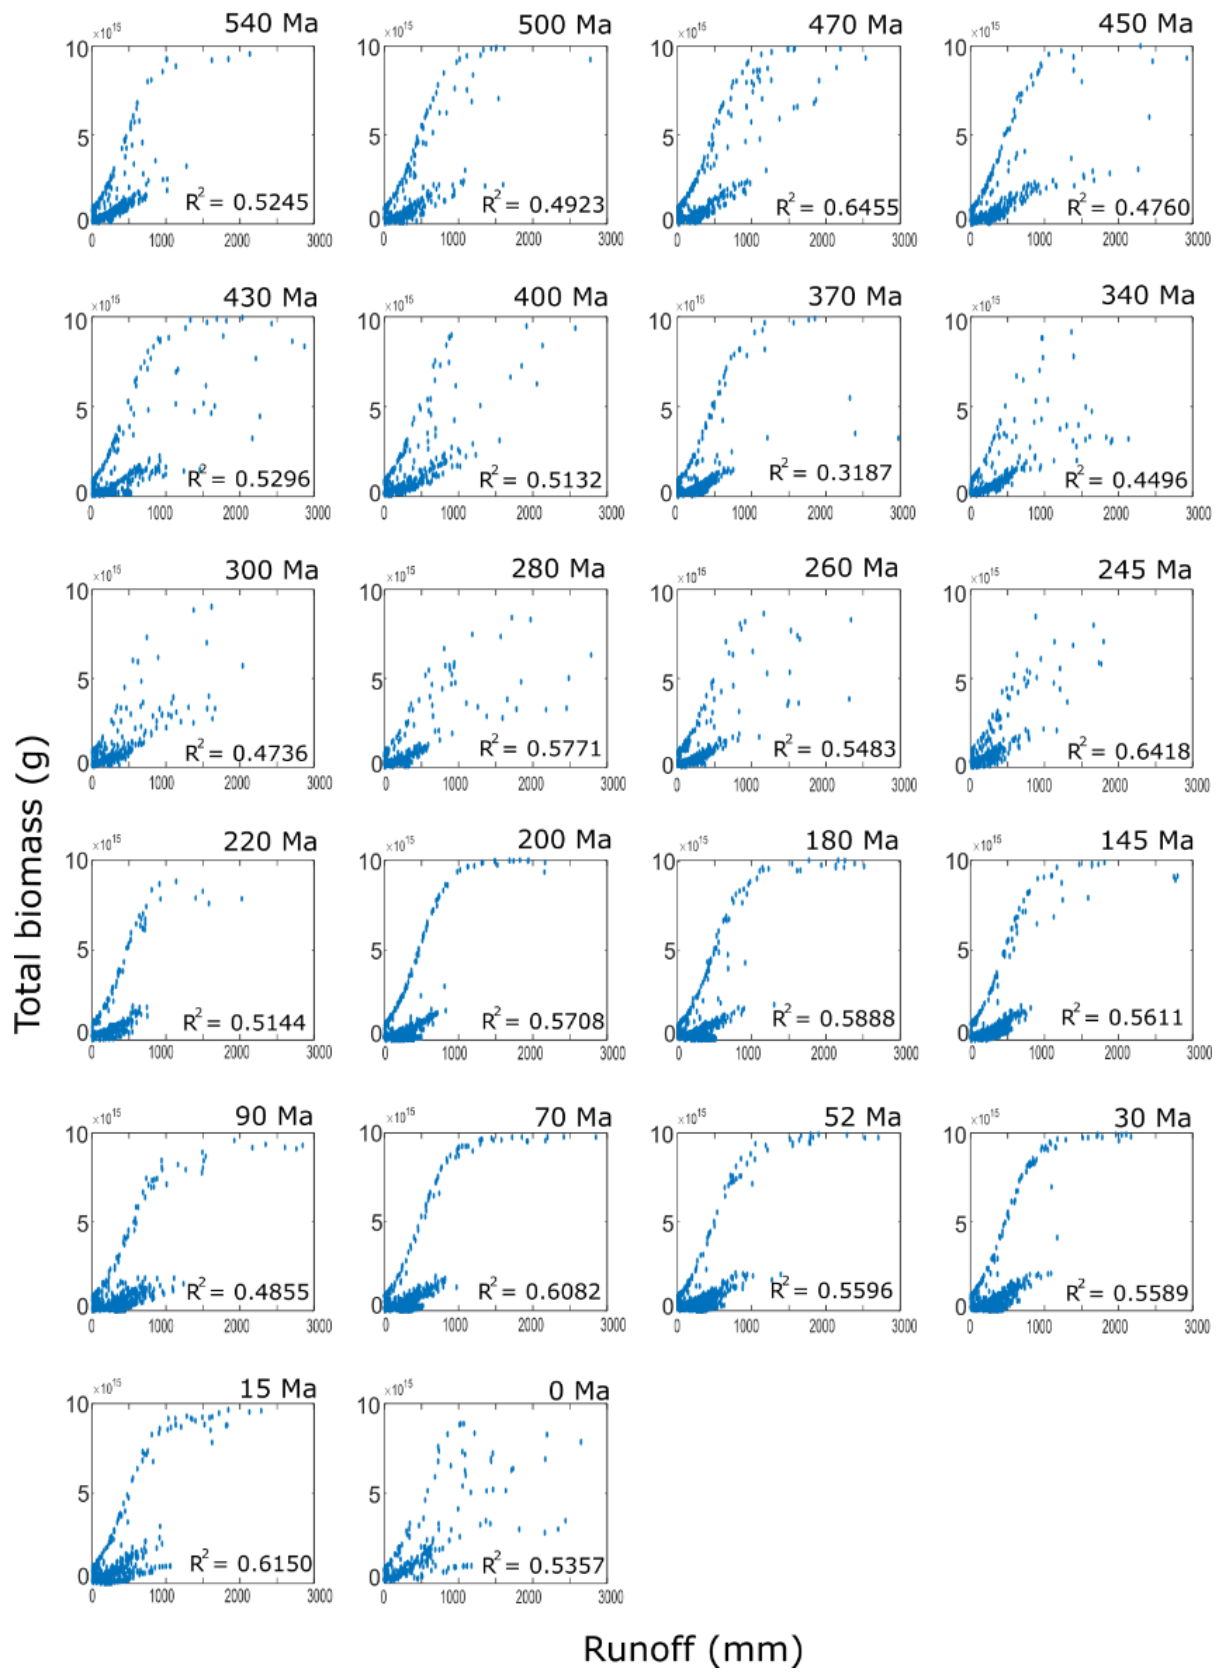

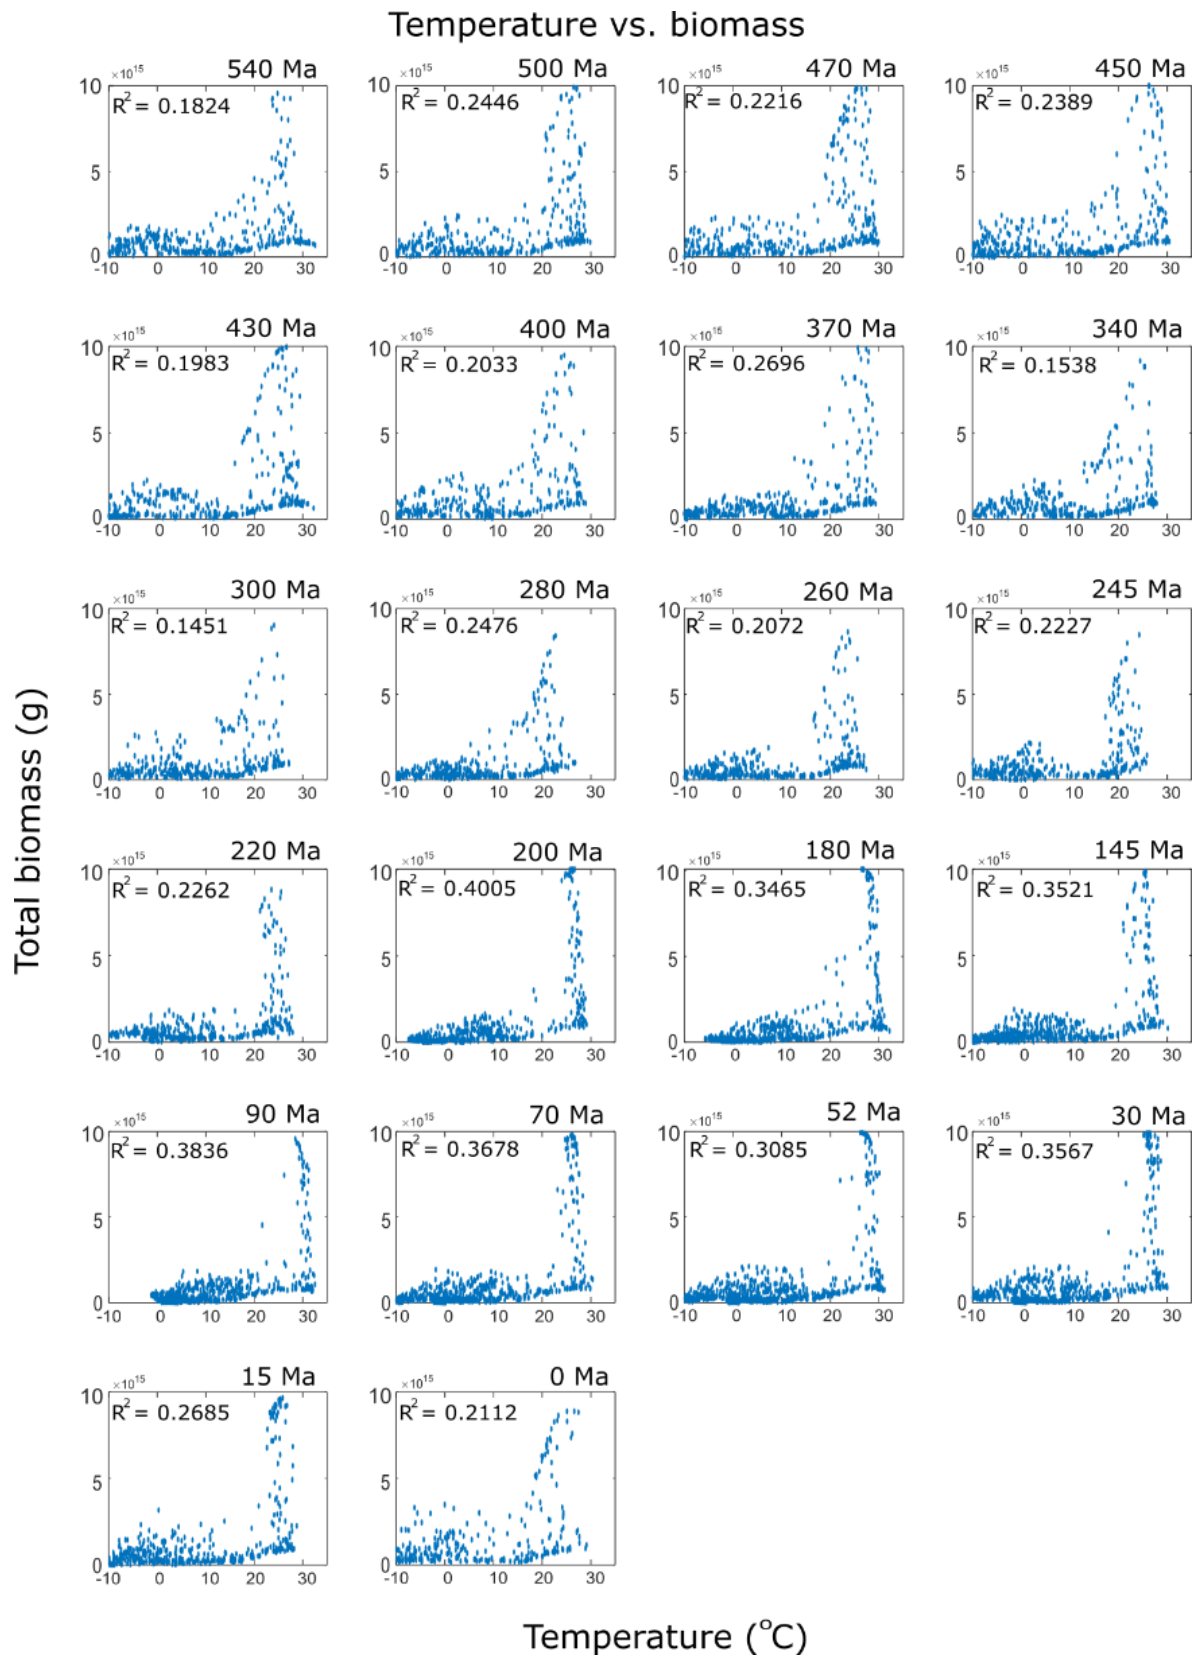

**Figure S3. R-squared values between biomass and runoff, and temperature for each time point.**

Average r-squared values are 0.5358 and 0.2615 respectively.

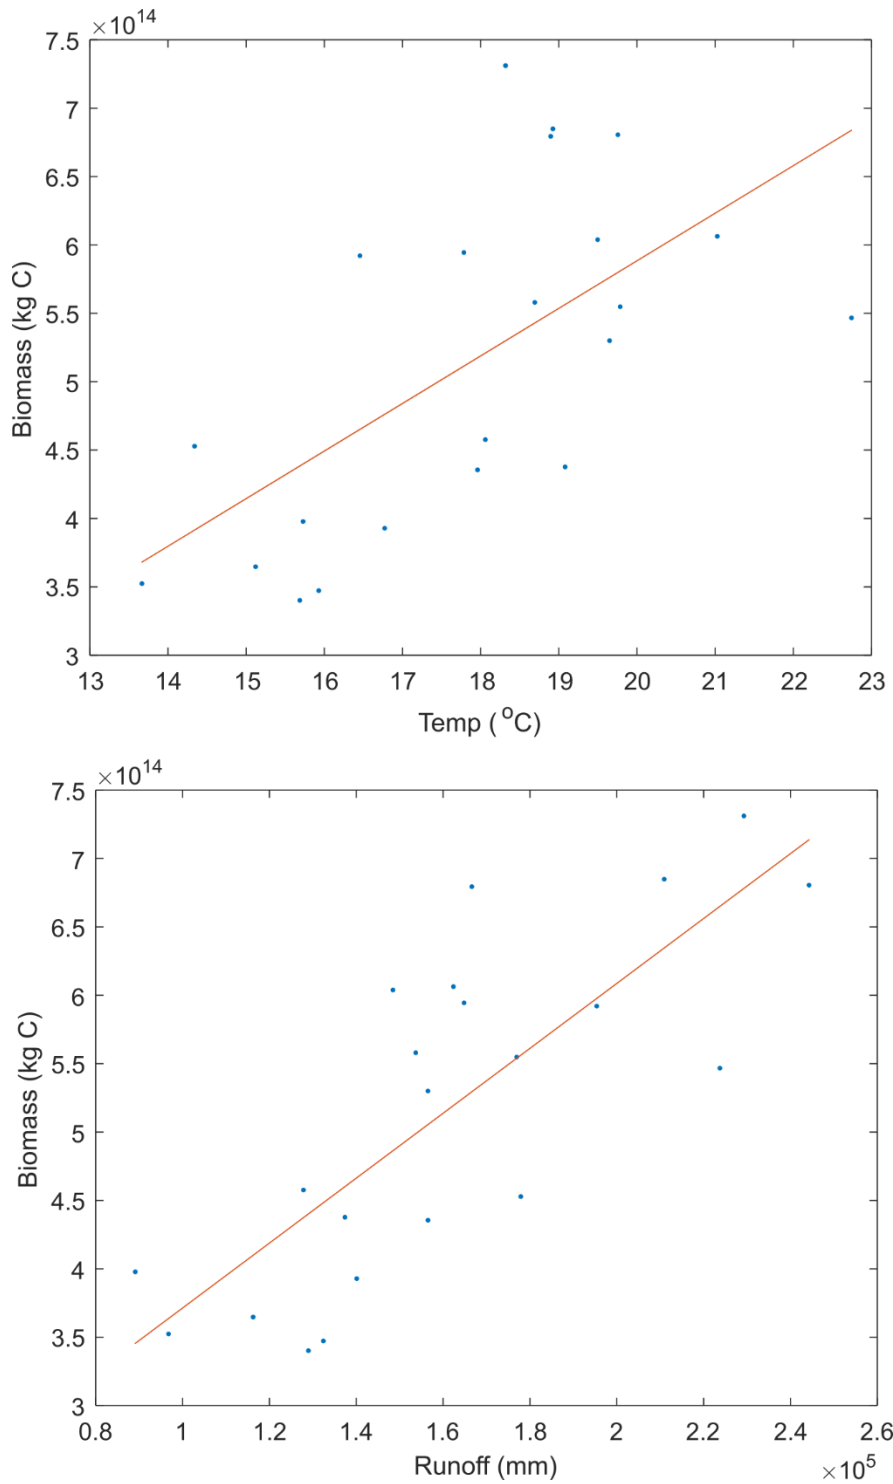

**Figure S4. Linear regression between total global biomass, global temperature and global runoff.** Using the 22 timepoints within the Phanerozoic, r-squared values are 0.399 and 0.623 for average global temperature and total global runoff, respectively.

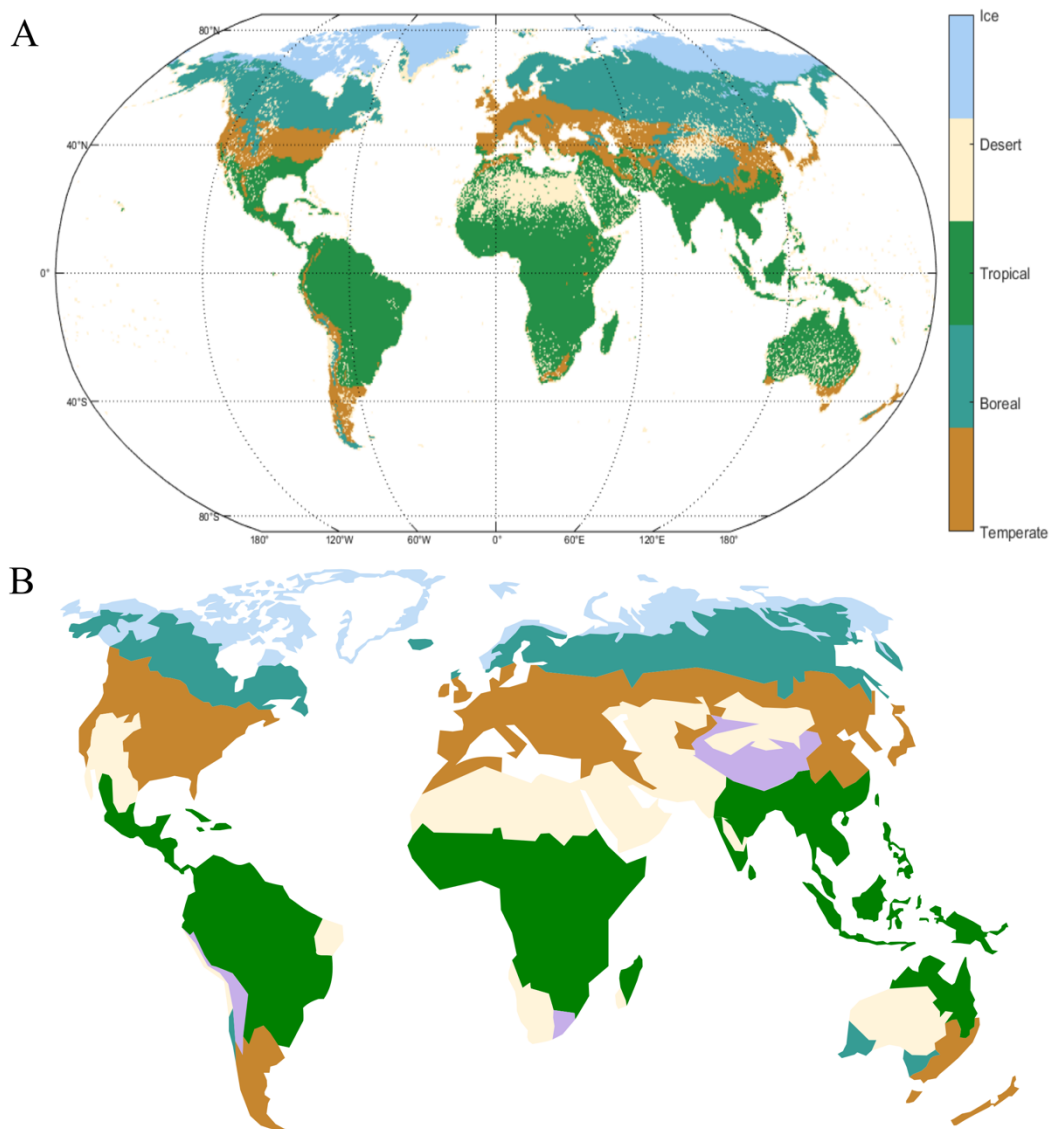

**Figure S5. Comparison of biome distribution.** A similar pattern is broadly observed between present day simplified biomes and FLORA predicted biomes. **(A)** Distribution of the three plant functional types (boreal, tropical and temperate) as predicted by FLORA using simple competition. Other biomes include the ice biome (land with temperatures  $< -10\text{ }^{\circ}\text{C}$ ) and desert biome (land where runoff  $< 0$ ) for present day. **(B)** Simplified map of present day terrestrial biomes modified from Trimble and Van Aarde (1). The original 14 biomes were condensed down to the five biomes used in FLORA, with the exception of the montane biome (purple).

**Table S1. Associated parameters for plant functional types.** Optimum temperature and temperature range (s.d: standard deviation), turnover ratio ( $f_{leaf}$ ) and respiration rate ( $r$ ) for each plant functional type.

| <b>Plant functional type</b> | <b>Temperature optimum (°C ± s.d)</b> | <b>Turnover ratio</b> | <b>Respiration rate (g C/g N/d)</b> |
|------------------------------|---------------------------------------|-----------------------|-------------------------------------|
| Tropical                     | 27 ± 7                                | 1                     | 0.011                               |
| Temperate                    | 15 ± 20                               | 0.75                  | 0.055                               |
| Boreal                       | 0 ± 20                                | 0.75                  | 0.066                               |

**Table S2. FLORA biomass outputs for each time-point with CO<sub>2</sub> and O<sub>2</sub> levels. O<sub>2</sub> (kPa)**

(2), CO<sub>2</sub> level (ppm) used (3) and the sum of potential global biomass (Gt C) for each time point predicted by FLORA. Ma: million years ago.

| <b>Time (Ma)</b> | <b>CO<sub>2</sub> (ppm)</b> | <b>O<sub>2</sub> (kPa)</b> | <b>Biomass (Gt C)</b> |
|------------------|-----------------------------|----------------------------|-----------------------|
| 540              | 5600                        | 1.9                        | 458                   |
| 500              | 3360                        | 5.14                       | 558                   |
| 470              | 3360                        | 3.74                       | 679                   |
| 450              | 2800                        | 5.05                       | 530                   |
| 430              | 2240                        | 14.94                      | 555                   |
| 400              | 1680                        | 16.76                      | 436                   |
| 370              | 1400                        | 16.22                      | 438                   |
| 340              | 700                         | 24.76                      | 393                   |
| 300              | 560                         | 25.52                      | 347                   |
| 280              | 700                         | 27.25                      | 340                   |
| 260              | 700                         | 31.05                      | 365                   |
| 245              | 1120                        | 30.77                      | 352                   |
| 220              | 1680                        | 32.38                      | 398                   |
| 200              | 1680                        | 28.6                       | 604                   |
| 180              | 1680                        | 25.13                      | 606                   |
| 145              | 840                         | 25.86                      | 594                   |
| 90               | 1120                        | 26.65                      | 547                   |
| 70               | 560                         | 27.69                      | 685                   |
| 52               | 700                         | 25.12                      | 681                   |
| 30               | 560                         | 21.41                      | 731                   |
| 15               | 360                         | 21.57                      | 592                   |
| 0                | 280                         | 20.72                      | 453                   |



## References

1. Trimble, M. J. & Aarde, R. J. van. Geographical and taxonomic biases in research on biodiversity in human-modified landscapes. *Ecosphere* **3**, 1–16 (2012).
2. Krause, A. J. *et al.* Stepwise oxygenation of the Paleozoic atmosphere. *Nat. Commun.* **2018 9**, 1–10 (2018).
3. Mills, B. J. W. *et al.* Modelling the long-term carbon cycle, atmospheric CO<sub>2</sub>, and Earth surface temperature from late Neoproterozoic to present day. *Gondwana Res.* **67**, 172–186 (2019).
