# Supplementary material for: Climate windows of opportunity for plant expansion during the Phanerozoic
Source: Springer Nature journal article supplement (doi:10.1038/s41467-022-32077-7), 2022-08-04
Supplement: 41467_2022_32077_MOESM3_ESM.pdf [file 41467_2022_32077_MOESM3_ESM.pdf]

### **Description of Additional Supplementary Files**

File Name: Supplementary Code 1

Description: Contains the MatLab code for FLORA, its validation and its run over the Phanerozoic. Parameter datasets are also included.
